# Supplementary material
Source: PubMed Central journal article supplement (PMC5838591)
Supplement: jamapsychiatry-75-185-s001.pdf [file jamapsychiatry-75-185-s001.pdf]

## Supplementary Online Content

Björkenstam E, Hjern A, Björkenstam C, Kosidou K. Association of cumulative childhood adversity and adolescent violent offending with suicide in early adulthood. *JAMA Psychiatry*. Published online December 13, 2017. doi:10.1001/jamapsychiatry.2017.3788

**eTable 1.** Description of the Registers Used

**eTable 2.** Number of Individuals Who Had Experienced Different Childhood Adversities and Combination of Adversities.

**eTable 3.** Risk of Violent Offending by Exposure to Cumulative Childhood Adversity\*

**eTable 4.** Risk of Suicide From Age 20, by Exposure to Adolescent Violent Offending and Childhood Adversity Stratified by History of Self-harm

**eTable 5.** Risk of Suicide From Age 20 by Exposure to Adolescent Violent Offending and Cumulative Childhood Adversity Stratified by History of Self-harm

**eTable 6.** Number of Individuals With Violent Offending and Suicide by Sex and Type of Psychiatric Disorder Before Age 20 Years

**This supplementary material has been provided by the authors to give readers additional information about their work.**

**eTable 1.** Description of the Registers Used

| <b>Register</b>                                                                 | <b>Years*</b> | <b>Coverage</b>                                                                   | <b>Variables</b>                                                                        |
|---------------------------------------------------------------------------------|---------------|-----------------------------------------------------------------------------------|-----------------------------------------------------------------------------------------|
| Medical Birth Register                                                          | 1973-2013     | All births in Sweden                                                              | Date of birth                                                                           |
| Causes of Death Register                                                        | 1952-2013     | All deaths of Swedish residents                                                   | Date of death, underlying cause of death                                                |
| National Patient Register                                                       | 1987-2013     | All individuals admitted to psychiatric or general hospitals                      | Date of admission and discharge, diagnoses                                              |
| Total Enumeration Income Survey                                                 | 1968-2013     | Data on the income of and governmental benefits provided to all Swedish residents | Household public assistance                                                             |
| Total Population Register                                                       | 1968-2013     | Based on data from the Swedish Tax Agency                                         | Demographic characteristics including age, sex, place of residence and country of birth |
| Longitudinal Integration Database for Health Insurance and Labor Market Studies | 1990-2013     | Existing data integrated from the labor market, educational and social sectors.   | Parental marital status and education                                                   |
| Register of Court Convictions                                                   | 1973-2013     | Information on all court convictions in Sweden                                    | Date of conviction, type of conviction and penalty                                      |
| National Child Welfare Register                                                 | 1968-2013     | Records on children and young persons subjected to child welfare measures         | Foster care, residential care                                                           |
| Multi-Generation Register                                                       | 2000-2013     | All known relationships between children and parents since 1961                   | Index numbers to link families together                                                 |

\* Most recent year used in the study

**eTable 2.** Number of Individuals Who Had Experienced Different Childhood Adversities and Combination of Adversities.

|                                     | 1      | 2      | 3      | 4      | 5       | 6      | 7     | 8     |
|-------------------------------------|--------|--------|--------|--------|---------|--------|-------|-------|
| 1. Parental death                   | 11,065 | 1,560  | 1,250  | 1,663  | 6,899   | 1,039  | 966   | 304   |
| 2. Parental substance abuse         | -      | 14,357 | 4,666  | 5,032  | 7,767   | 5,204  | 2,434 | 792   |
| 3. Substantial parental criminality | -      | -      | 19,676 | 3,422  | 10,373  | 7,563  | 2,369 | 1,082 |
| 4. Parental psychiatric disorder    | -      | -      | -      | 24,212 | 11,558  | 4,127  | 2,441 | 974   |
| 5. Parental separation              | -      | -      | -      | -      | 114,432 | 12,162 | 3,500 | 3,887 |
| 6. Public assistance reciprocity    | -      | -      | -      | -      | -       | 20,944 | 3,111 | 1,395 |
| 7. Child welfare intervention       | -      | -      | -      | -      | -       | -      | 6,442 | 795   |
| 8. Residential instability          | -      | -      | -      | -      | -       | -      | -     | 6,098 |

**eTable 3.** Risk of Violent Offending by Exposure to Cumulative Childhood Adversity\*

| <b>Number of childhood adversities</b> | <b>Model I<sup>a</sup></b> | <b>Model II<sup>b</sup></b> | <b>Model III<sup>c</sup></b> |
|----------------------------------------|----------------------------|-----------------------------|------------------------------|
| 0                                      | 1 (REF)                    | 1 (REF)                     | 1 (REF)                      |
| 1                                      | 2.5 (2.4-2.6)              | 2.2 (2.1-2.4)               | 2.1 (2.0-2.2)                |
| 2                                      | 4.2 (3.9-4.5)              | 3.3 (3.1-3.6)               | 2.9 (2.8-3.1)                |
| 3                                      | 6.7 (6.2-7.3)              | 5.0 (4.6-5.5)               | 4.2 (3.8-4.5)                |
| 4+                                     | 9.3 (8.5-10.1)             | 6.7 (6.1-7.3)               | 5.1 (4.6-5.5)                |

\* Incidence Rate Ratios with 95% confidence intervals

<sup>a</sup> Adjusted for birth year and sex

<sup>b</sup> Model I with additional adjustments for parental country of birth and parental education

<sup>c</sup> Model II with additional adjustments for psychiatric disorder prior to age 20 years

**eTable 4.** Risk of Suicide From Age 20, by Exposure to Adolescent Violent Offending and Childhood Adversity Stratified by History of Self-harm

|                                  | Self-harm before age 20=0 (n= 470,909) |                   | Self-harm before age 20=1 (n= 5,194) |                   |
|----------------------------------|----------------------------------------|-------------------|--------------------------------------|-------------------|
|                                  | No violent offending                   | Violent offending | No violent offending                 | Violent offending |
| Parental death                   |                                        |                   |                                      |                   |
| No                               | 1 (REF)                                | 4.7 (3.6-6.2)     | 1 (REF)                              | 2.1 (1.1-3.9)     |
| Yes                              | 1.2 (0.7-2.1)                          | 12.3 (5.8-26.2)   | n/a                                  | n/a               |
| Parental suicide                 |                                        |                   |                                      |                   |
| No                               | 1 (REF)                                | 5.0 (3.8-6.5)     | 1 (REF)                              | 2.1 (1.1-3.9)     |
| Yes                              | 2.5 (1.1-5.5)                          | 14.6 (3.7-58.8)   | n/a                                  | n/a               |
| Parental substance abuse         |                                        |                   |                                      |                   |
| No                               | 1 (REF)                                | 4.7 (3.5-6.3)     | 1 (REF)                              | 1.4 (0.6-3.3)     |
| Yes                              | 2.9 (2.1-4.0)                          | 11.0 (6.5-18.9)   | 3.1 (1.6-6.2)                        | 8.1 (3.4-19.1)    |
| Substantial parental criminality |                                        |                   |                                      |                   |
| No                               | 1 (REF)                                | 4.8 (3.6-6.5)     | 1 (REF)                              | 1.7 (0.8-3.7)     |
| Yes                              | 2.1 (1.5-2.8)                          | 7.9 (4.8-13.1)    | 1.3 (0.5-3.0)                        | 3.6 (1.4-9.3)     |
| Parental psychiatric disorder    |                                        |                   |                                      |                   |
| No                               | 1 (REF)                                | 5.2 (4.0-6.9)     | 1 (REF)                              | 2.2 (1.4-4.3)     |
| Yes                              | 2.0 (1.5-2.7)                          | 5.9 (2.9-11.9)    | 0.8 (0.3-2.1)                        | 1.0 (0.1-7.0)     |
| Parental separation              |                                        |                   |                                      |                   |
| No                               | 1 (REF)                                | 4.6 (3.2-6.7)     | 1 (REF)                              | 2.1 (0.9-4.9)     |
| Yes                              | 1.5 (1.2-1.8)                          | 6.9 (4.8-9.8)     | 1.1 (0.6-1.9)                        | 2.2 (0.9-5.3)     |
| Public assistance reciprocity    |                                        |                   |                                      |                   |
| No                               | 1 (REF)                                | 4.9 (3.6-6.6)     | 1 (REF)                              | 1.7 (0.8-3.8)     |
| Yes                              | 2.5 (1.9-3.4)                          | 8.3 (5.1-13.4)    | 1.5 (0.7-3.3)                        | 3.9 (1.5-10.1)    |
| Child welfare intervention       |                                        |                   |                                      |                   |
| No                               | 1 (REF)                                | 5.1 (3.9-6.7)     | 1 (REF)                              | 2.1 (1.1-4.1)     |
| Yes                              | 2.5 (1.5-4.1)                          | 5.5 (2.3-13.4)    | 0.7 (0.1-2.9)                        | 1.2 (0.2-9.1)     |
| Residential instability          |                                        |                   |                                      |                   |
| No                               | 1 (REF)                                | 5.0 (3.8-6.5)     | 1 (REF)                              | 2.0 (1.0-3.9)     |
| Yes                              | 0.6 (0.2-1.7)                          | 5.7 (1.8-17.9)    | 1.5 (0.4-6.2)                        | 4.1 (0.5-30.2)    |

\* Multi-adjusted Incidence Rate Ratios with 95% confidence intervals

<sup>a</sup> Adjusted for sex, birth year, parental country of birth and parental education

**eTable 5.** Risk of Suicide From Age 20 by Exposure to Adolescent Violent Offending and Cumulative Childhood Adversity Stratified by History of Self-harm

| Number of childhood adversities | Self-harm before age 20=0<br>(n=470,909) |                   | Self-harm before age 20=1 (n=5,194) |                   |
|---------------------------------|------------------------------------------|-------------------|-------------------------------------|-------------------|
|                                 | No violent offending                     | Violent offending | No violent offending                | Violent offending |
| 0                               | 1 (REF)                                  | 6,0 (3,7-9,5)     | 1 (REF)                             | 1,9 (0,6-6,4)     |
| 1                               | 1,5 (1,2-1,9)                            | 6,8 (4,1-11,3)    | 0,8 (0,4-1,5)                       | 1,6 (0,4-6,8)     |
| 2                               | 2,2 (1,6-3,0)                            | 14,0 (8,4-23,3)   | 1,3 (0,6-3,0)                       | 3,6 (1,1-11,9)    |
| 3                               | 2,5 (1,6-4,0)                            | 12,9 (6,4-26,2)   | 1,2 (0,4-4,1)                       | 4,5 (1,1-19,5)    |
| 4+                              | 3,3 (2,0-5,4)                            | 15,8 (7,8-32,0)   | 1,7 (0,6-4,9)                       | 5,2 (1,5-17,8)    |

\* Multi-adjusted Incidence Rate Ratios with 95% confidence intervals

<sup>a</sup> Adjusted for sex, birth year, parental country of birth and parental education

**eTable 6.** Number of Individuals With Violent Offending and Suicide by Sex and Type of Psychiatric Disorder Before Age 20 Years

|                                               | Women        |                    |           | Men          |                    |            |
|-----------------------------------------------|--------------|--------------------|-----------|--------------|--------------------|------------|
|                                               | Total        | Violent Conviction | Suicide   | Total        | Violent Conviction | Suicide    |
| N                                             | 231,699      | 1,616              | 155       | 244,404      | 7,533              | 468        |
| <i>Any psychiatric disorder before age 20</i> | 19,825 (8.6) | 562 (34.8)         | 86 (55.5) | 13,677 (5.6) | 1,601 (21.3)       | 131 (28)   |
| Substance abuse                               | 5,887 (2.5)  | 327 (20.2)         | 33 (21.3) | 5,332 (2.2)  | 929 (12.3)         | 112 (23.9) |
| Psychotic disorders                           | 252 (0.2)    | 12 (0.7)           | 2 (1.3)   | 265 (0.1)    | 45 (0.6)           | 7 (1.5)    |
| Mood disorders                                | 5,380 (2.3)  | 121 (7.5)          | 33 (21.3) | 2,290 (0.9)  | 211 (2.8)          | 28 (6)     |
| Anxiety spectrum disorders                    | 6,597 (2.8)  | 176 (10.9)         | 35 (22.6) | 2,806 (1.1)  | 261 (3.5)          | 27 (5.8)   |
| Self-harm                                     | 3,844 (1.7)  | 188 (11.6)         | 38 (24.5) | 1,350 (0.6)  | 263 (3.5)          | 30 (6.4)   |
| Any personality disorder                      | 633 (0.3)    | 31 (1.9)           | 9 (5.8)   | 152 (0.1)    | 36 (0.5)           | 1 (0.2)    |
